# Supplementary material for: A Nonlinear Generalized Boussinesq Equation ((2+1)-D) for Rossby-Khantadze Waves
Source: Copernicus journal article supplement (doi:10.5194/egusphere-2025-123), 2025-01-28
Supplement: Supplementary file [file egusphere-2025-123-AC1-supplement.pdf]

**Title:** A Nonlinear Generalised Boussinesq Equation ((2+1)-D) for Rossby-Khantadze Waves

**Authors:** Laila Zafar Kahlon et al.

**MS No.:** egusphere-2025-123

**MS type:** Regular paper

**Response to Referee 1:**

Dear Reviewer 1,

We sincerely appreciate the time and effort you have taken to evaluate our manuscript (egusphere-2025-123) and provide constructive feedback. By keeping your all comments in our mind, we have made the following changes in our manuscript:

In Pages 1-2, lines 40-51 in the introduction, the following addition “Such slow long-period planetary waves have phase velocities of the order of 1–100 m/s, which is around the...” have been made alongwith some additional references.

Also, the more specific references have been added by keeping in mind the referee comment, namely Khantadze et al. etc.

The writing in many places have been changed to create clarity.

In support of interpretation, we have improved the figures and text.

Best Regards,

Authors
