# Supplementary material for: A Nonlinear Generalized Boussinesq Equation ((2+1)-D) for Rossby-Khantadze Waves
Source: Copernicus journal article supplement (doi:10.5194/egusphere-2025-123), 2025-01-28
Supplement: Supplementary file [file egusphere-2025-123-AC2-supplement.pdf]

**Title:** A Nonlinear Generalised Boussinesq Equation  $((2+1)\text{-D})$  for Rossby-Khantadze Waves

**Authors:** Laila Zafar Kahlon et al.

**MS No.:** egusphere-2025-123

**MS type:** Regular paper

**Response to Referee 2:**

Dear Reviewer 2,

Thank you for your kind suggestions. By keeping in mind your suggestions, the following addition have been made in the manuscript:

The step-wise following changes have been made:

1. The font size of figure labels has been increased, the legend has been added for blue and red curves. The normalization is already added in the text in p#6, lines 218-219.
2. In Figure 2, the font size for tick labels has been increased and also the axes labels have been made.
3. The abstract has been rewritten more concisely.
4. Throughout the manuscript, the English is improved in the text.

Best Regards,  
Authors
